# Supplementary material for: Phosphorylation of pericyte FAK-Y861 affects tumour cell apoptosis and tumour blood vessel regression
Source: Springer Nature journal article supplement (doi:10.1007/s10456-021-09776-8), 2021-03-17

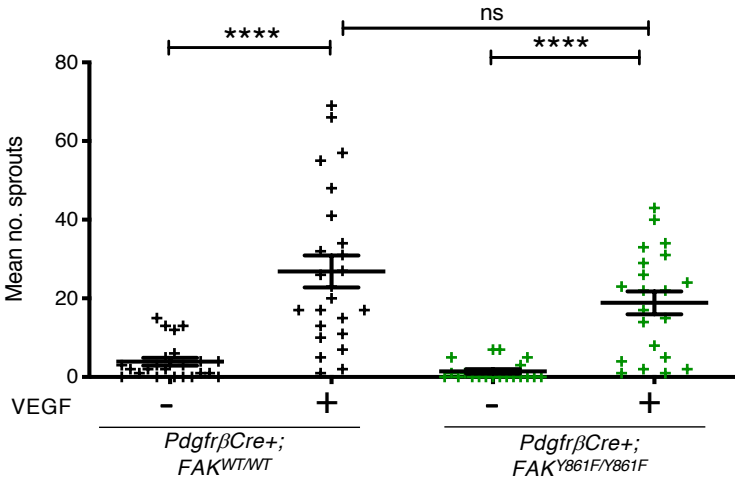

Supplement: MOESM2 [file 18975990]
